# Supplementary material
Source: PubMed Central journal article supplement (PMC6714543)
Supplement: ao9b02108_si_001.pdf [file ao9b02108_si_001.pdf]

## Supplementary Information

# A comparative study of the vibrational optical activity techniques in structure elucidation: The case of galantamine

Ewoud De Gussem<sup>†,‡</sup>, Kourosch Abbaspour Tehrani<sup>‡</sup>, Wouter A. Herrebout<sup>‡</sup>, Patrick Bultinck<sup>†</sup>, Christian Johannessen<sup>‡\*</sup>

<sup>†</sup> Ghent Quantum Chemistry Group, Department of Chemistry, Ghent University, Krijgslaan 281 (S3), 9000 Ghent, Belgium, <sup>‡</sup> Department of Chemistry, University of Antwerp, Groenenborgerlaan 171, 2020 Antwerp, Belgium

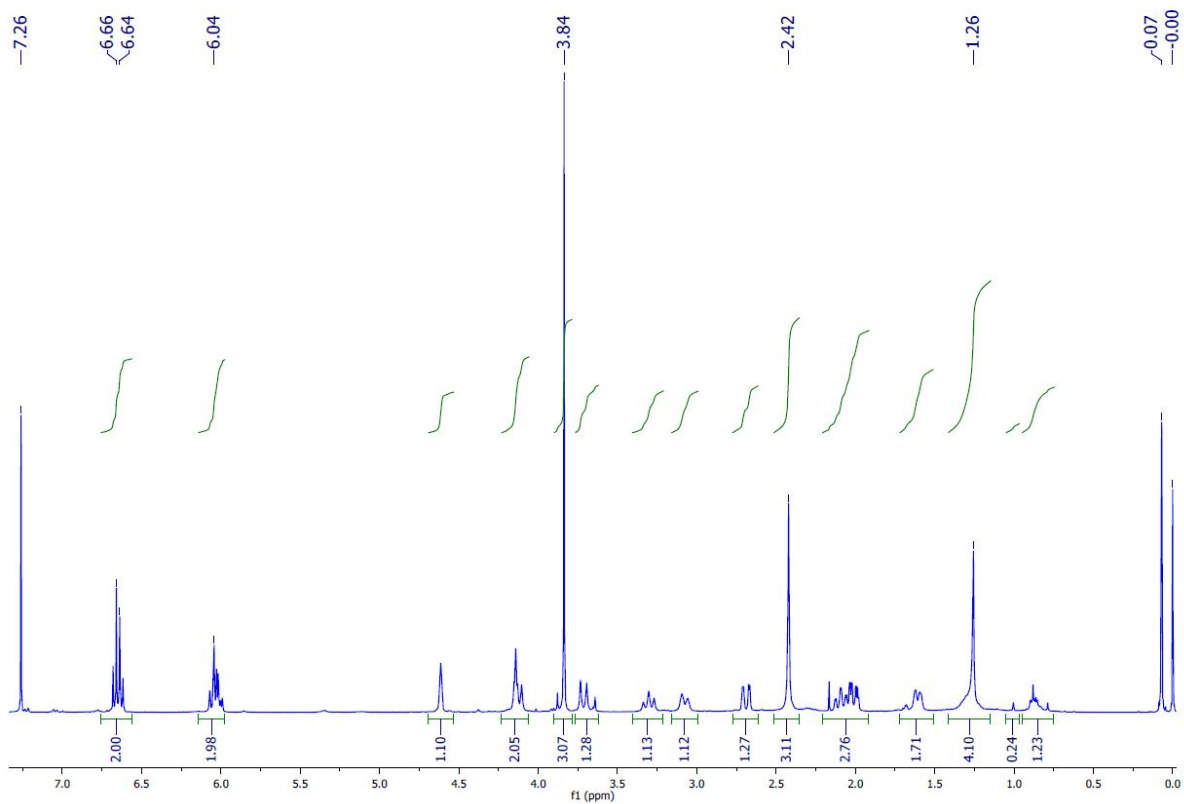

Figure S1.  $^1\text{H}$  NMR spectrum of Galantamine ( $\text{CDCl}_3$ , 400 MHz).

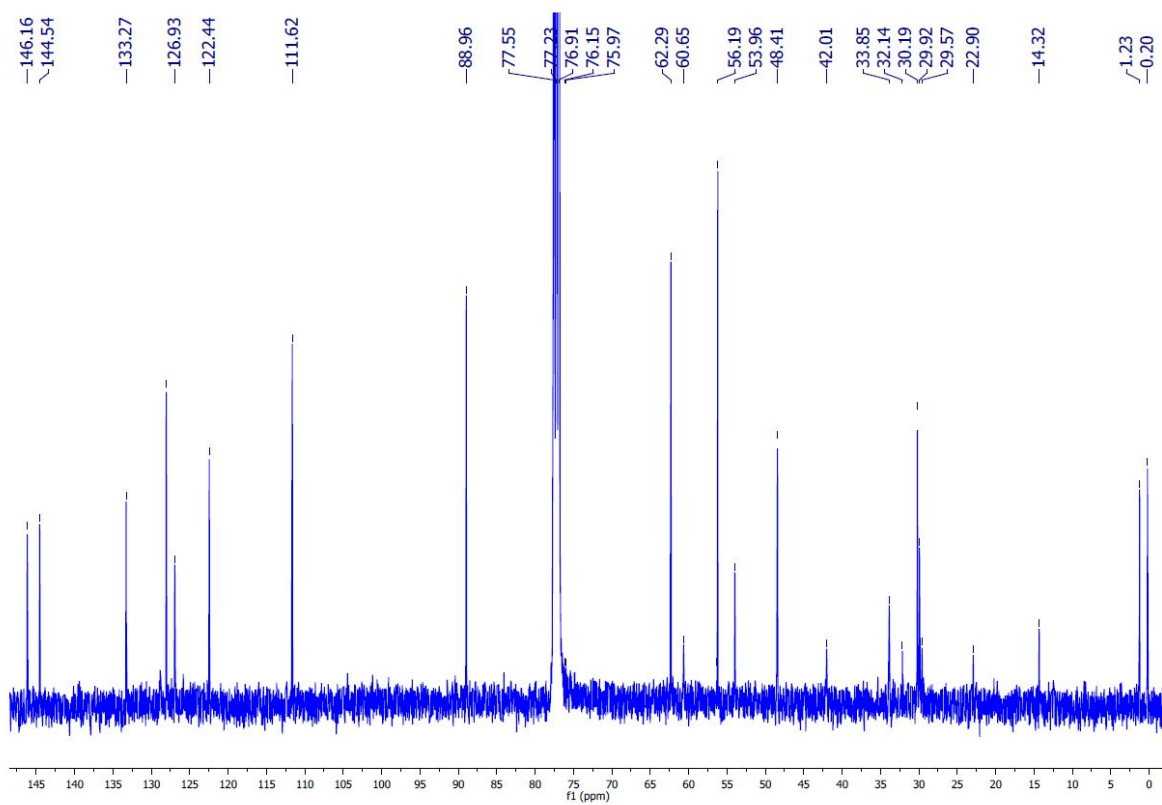

Figure S2.  $^{13}\text{C}$  NMR spectrum of Galantamine ( $\text{CDCl}_3$ , 100 MHz).

meting 14/10/2011  
product Kourosch Tehrani  
COSY-meting

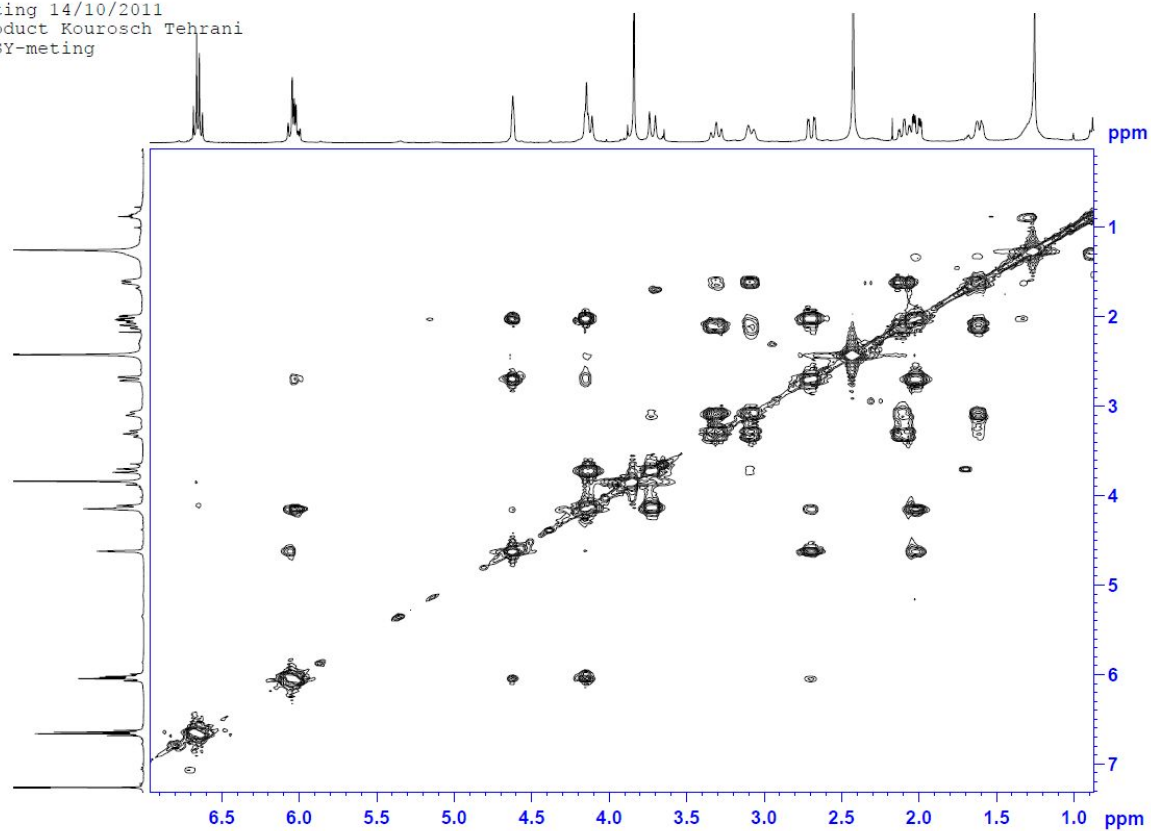

Figure S3. COSY spectrum of Galantamine ( $\text{CDCl}_3$ , 400 MHz).

meting 14/10/2011  
product Kourosch Tehrani  
NOESY-meting

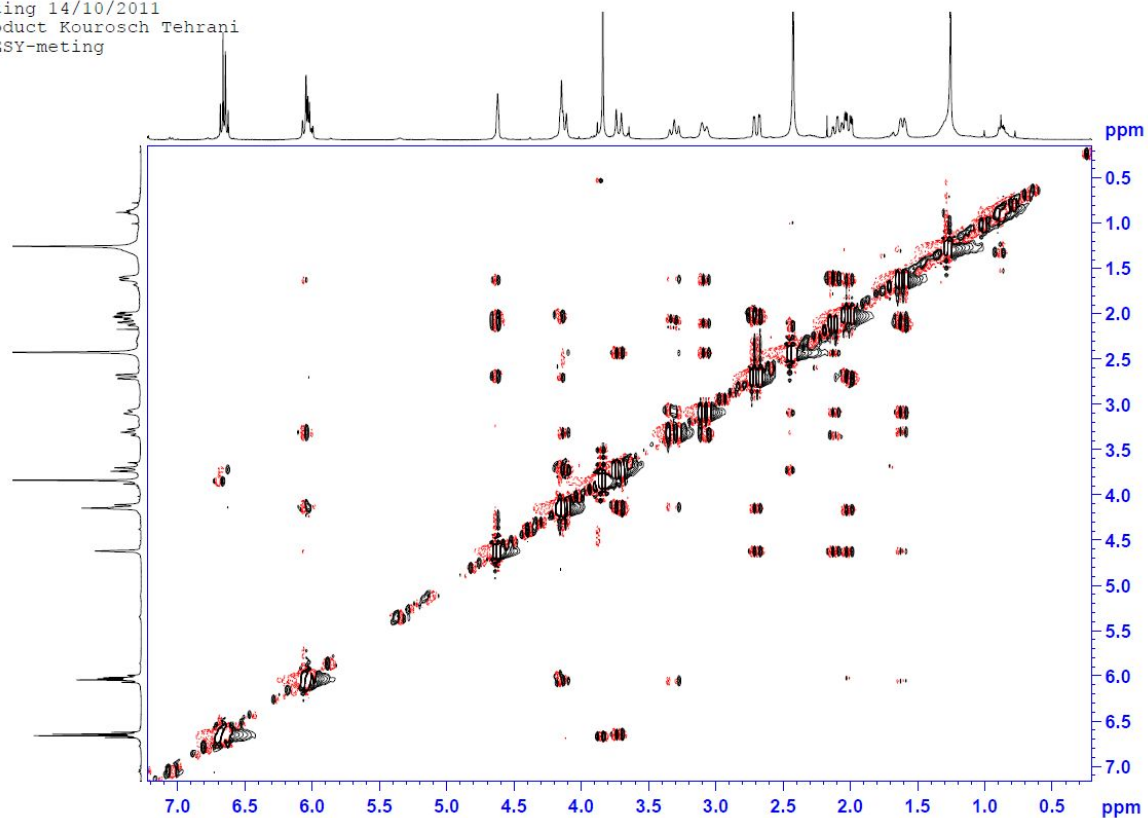

Figure S4. NOESY spectrum of Galantamine ( $\text{CDCl}_3$ , 400 MHz).

meting 14/10/2011  
product Kourosch Tehrani  
HMQC-meting

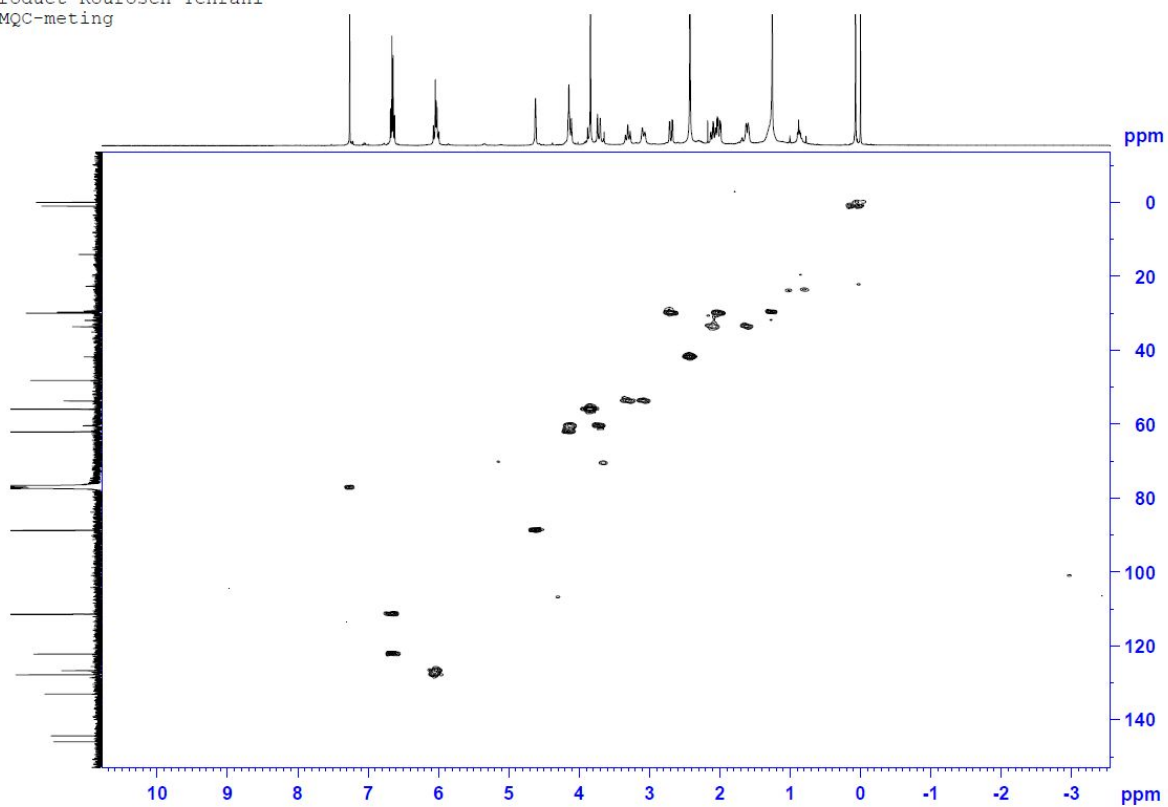

Figure S5. HMQC spectrum of Galantamine ( $\text{CDCl}_3$ , 400 MHz).
